# Supplementary material for: Environmental Nontuberculous Mycobacteria in the Hawaiian Islands
Source: PubMed Central journal article supplement (PMC5079566; doi:10.1371/journal.pntd.0005068), 2016-10-25
Supplement: pntd.0005068.s002.pdf [file pntd.0005068.s002.pdf]

| Isolate/Strain  | Species                             | Location | Accession # |
|-----------------|-------------------------------------|----------|-------------|
| 12-2-Sw-A-1     | <i>Mycobacterium porcinum</i>       | Hawaii   | KU128541    |
| 12-36-Sw-A-2    | <i>Mycobacterium porcinum</i>       | Hawaii   | KU128542    |
| 12-39-Sw-B-1    | <i>Mycobacterium abscessus</i>      | Hawaii   | KU128543    |
| 12-45-Sw-A-2    | <i>Mycobacterium abscessus</i>      | Hawaii   | KU128544    |
| 12-55-Sw-B-1    | <i>Mycobacterium paraffinicum</i>   | Hawaii   | KU128545    |
| 12-56-S-1-2     | <i>Mycobacterium intracellulare</i> | Hawaii   | KU128546    |
| 12-57-Sw-A-1    | <i>Mycobacterium abscessus</i>      | Hawaii   | KU128547    |
| 12-57-Sw-B-1    | <i>Mycobacterium gordonae</i>       | Hawaii   | KU128548    |
| 12-7-S-1-3      | <i>Mycobacterium chimaera</i>       | Hawaii   | KU128549    |
| 12-57-S-1-2     | <i>Mycobacterium flavescens</i>     | Hawaii   | KU128550    |
| 12-58-Sw-B-1    | <i>Mycobacterium abscessus</i>      | Hawaii   | KU128551    |
| 12-58-S-1-1     | <i>Mycobacterium rhodesiae</i>      | Hawaii   | KU128552    |
| 12-59-Sw-B-3    | <i>Mycobacterium canariasense</i>   | Hawaii   | KU128553    |
| 12-61-Sw-B-1    | <i>Mycobacterium porcinum</i>       | Hawaii   | KU128554    |
| 12-62-Sw-A-2    | <i>Mycobacterium porcinum</i>       | Hawaii   | KU128555    |
| KAU-12-2-Sw-A-1 | <i>Mycobacterium porcinum</i>       | Hawaii   | KU128556    |
| KAU-12-2-Sw-B-5 | <i>Mycobacterium porcinum</i>       | Hawaii   | KU128557    |
| KAU-12-2-Sw-B-3 | <i>Mycobacterium porcinum</i>       | Hawaii   | KU128558    |
| KAU-12-2-Sw-B-4 | <i>Mycobacterium porcinum</i>       | Hawaii   | KU128559    |
| 12-9-Sw-B-1     | <i>Mycobacterium porcinum</i>       | Hawaii   | KU128560    |
| KAU-12-5-S-1-2  | <i>Mycobacterium alvei</i>          | Hawaii   | KU128561    |
| KAU-12-7-Sw-B-1 | <i>Mycobacterium porcinum</i>       | Hawaii   | KU128562    |
| KAU-12-9-Sw-B-1 | <i>Mycobacterium porcinum</i>       | Hawaii   | KU128563    |
| KAU-12-9-Sw-B-2 | <i>Mycobacterium porcinum</i>       | Hawaii   | KU128564    |
| 12-22-S-1-1     | <i>Mycobacterium chimaera</i>       | Hawaii   | KU128565    |
| 12-26-S-1-2     | <i>Mycobacterium gadium</i>         | Hawaii   | KU128566    |
| 12-30-Sw-A-1    | <i>Mycobacterium abscessus</i>      | Hawaii   | KU128567    |
| 12-36-Sw-A-1    | <i>Mycobacterium porcinum</i>       | Hawaii   | KU128568    |
| 12-39-Sw-A-2    | <i>Mycobacterium phocaicum</i>      | Hawaii   | KU128569    |
| 12-42-Sw-B-2    | <i>Mycobacterium chelonae</i>       | Hawaii   | KU128570    |
| 12-49-Sw-B-1    | <i>Mycobacterium chimaera</i>       | Hawaii   | KU128571    |
| KAU-12-2-Sw-B-2 | <i>Mycobacterium chimaera</i>       | Hawaii   | KU128572    |
| KAU-12-5-Sw-A-1 | <i>Mycobacterium chelonae</i>       | Hawaii   | KU128573    |
| 12-20-Sw-B-2    | <i>Mycobacterium chelonae</i>       | Hawaii   | KU128574    |
| 12-30-Sw-A-2    | <i>Mycobacterium phocaicum</i>      | Hawaii   | KU128575    |
| 12-1-SW-A-1     | <i>Mycobacterium chelonae</i>       | Hawaii   | KU128576    |
| 12-4-S-1-1      | <i>Mycobacterium barrassiae</i>     | Hawaii   | KU128577    |
| 12-7-SW-A-2     | <i>Mycobacterium gadium</i>         | Hawaii   | KU128578    |
| 12-9-SW-A-1     | <i>Mycobacterium chelonae</i>       | Hawaii   | KU128579    |
| 12-9-SW-A-2     | <i>Mycobacterium chelonae</i>       | Hawaii   | KU128580    |
| 12-9-SW-A-3     | <i>Mycobacterium chelonae</i>       | Hawaii   | KU128581    |

|              |                                |        |          |
|--------------|--------------------------------|--------|----------|
| 12-9-SW-B-2  | <i>Mycobacterium abscessus</i> | Hawaii | KU128582 |
| 12-9-SW-B-3  | <i>Mycobacterium abscessus</i> | Hawaii | KU128583 |
| 12-20-SW-B-1 | <i>Mycobacterium chelonae</i>  | Hawaii | KU128584 |
| 12-24-SW-B-4 | <i>Mycobacterium abscessus</i> | Hawaii | KU128585 |
| 12-26-SW-B-1 | <i>Mycobacterium chelonae</i>  | Hawaii | KU128586 |
| 12-26-SW-B-2 | <i>Mycobacterium chelonae</i>  | Hawaii | KU128587 |
| 12-39-SW-A-1 | <i>Mycobacterium abscessus</i> | Hawaii | KU128588 |
| 12-39-SW-B-2 | <i>Mycobacterium abscessus</i> | Hawaii | KU128589 |
| 12-41-SW-B-1 | <i>Mycobacterium chelonae</i>  | Hawaii | KU128590 |
| 12-41-SW-B-2 | <i>Mycobacterium chelonae</i>  | Hawaii | KU128591 |
| 12-43-SW-B-1 | <i>Mycobacterium chelonae</i>  | Hawaii | KU128592 |
| 12-43-SW-B-2 | <i>Mycobacterium chelonae</i>  | Hawaii | KU128593 |
| 12-45-SW-A-1 | <i>Mycobacterium abscessus</i> | Hawaii | KU128594 |
| 12-48-SW-B-1 | <i>Mycobacterium abscessus</i> | Hawaii | KU128595 |
| 12-48-SW-B-3 | <i>Mycobacterium abscessus</i> | Hawaii | KU128596 |
| 12-48-SW-B-4 | <i>Mycobacterium abscessus</i> | Hawaii | KU128597 |
| 12-50-SW-A-1 | <i>Mycobacterium abscessus</i> | Hawaii | KU128598 |
| 12-53-SW-A-1 | <i>Mycobacterium chelonae</i>  | Hawaii | KU128599 |
| 12-53-SW-A-2 | <i>Mycobacterium chelonae</i>  | Hawaii | KU128600 |
| 12-54-SW-A-1 | <i>Mycobacterium chelonae</i>  | Hawaii | KU128601 |
| 12-54-SW-B-3 | <i>Mycobacterium chelonae</i>  | Hawaii | KU128602 |
| 12-60-SW-A-1 | <i>Mycobacterium chelonae</i>  | Hawaii | KU128603 |
| 12-60-SW-B-1 | <i>Mycobacterium chelonae</i>  | Hawaii | KU128604 |
| 12-62-SW-A-1 | <i>Mycobacterium chelonae</i>  | Hawaii | KU128605 |
| 12-44-SW-A-2 | <i>Mycobacterium chimaera</i>  | Hawaii | KU128606 |
| 12-44-SW-A-4 | <i>Mycobacterium chimaera</i>  | Hawaii | KU128607 |
| 12-48-SW-A-1 | <i>Mycobacterium chimaera</i>  | Hawaii | KU128608 |
| 12-48-SW-B-2 | <i>Mycobacterium chimaera</i>  | Hawaii | KU128609 |
| 12-49-SW-A-1 | <i>Mycobacterium chimaera</i>  | Hawaii | KU128610 |
| 12-49-SW-B-2 | <i>Mycobacterium chimaera</i>  | Hawaii | KU128611 |
| 12-50-SW-B-1 | <i>Mycobacterium chimaera</i>  | Hawaii | KU128612 |
| 12-50-SW-B-2 | <i>Mycobacterium chimaera</i>  | Hawaii | KU128613 |
| 12-54-SW-B-1 | <i>Mycobacterium chimaera</i>  | Hawaii | KU128614 |
| 12-54-SW-B-2 | <i>Mycobacterium chimaera</i>  | Hawaii | KU128615 |
| 12-55-SW-B-2 | <i>Mycobacterium chimaera</i>  | Hawaii | KU128616 |
| 12-55-SW-B-3 | <i>Mycobacterium chimaera</i>  | Hawaii | KU128617 |
| 12-56-SW-A-1 | <i>Mycobacterium chimaera</i>  | Hawaii | KU128618 |
| 12-56-SW-B-1 | <i>Mycobacterium chimaera</i>  | Hawaii | KU128619 |
| 12-57-SW-B-2 | <i>Mycobacterium chimaera</i>  | Hawaii | KU128620 |
| 12-58-SW-A-1 | <i>Mycobacterium chimaera</i>  | Hawaii | KU128621 |
| 12-58-SW-B-2 | <i>Mycobacterium chimaera</i>  | Hawaii | KU128622 |
| 12-61-SW-A-1 | <i>Mycobacterium chimaera</i>  | Hawaii | KU128623 |
| 12-61-SW-A-2 | <i>Mycobacterium chimaera</i>  | Hawaii | KU128624 |

|                  |                                   |        |          |
|------------------|-----------------------------------|--------|----------|
| KAU12-3-SW-A-1   | <i>Mycobacterium chimaera</i>     | Hawaii | KU128625 |
| KAU12-10-SW-A-1  | <i>Mycobacterium chimaera</i>     | Hawaii | KU128626 |
| KAU12-10-SW-A-2  | <i>Mycobacterium chimaera</i>     | Hawaii | KU128627 |
| MOL12-1-SW-B-1   | <i>Mycobacterium chimaera</i>     | Hawaii | KU128628 |
| MOL12-4-SW-A-1   | <i>Mycobacterium chimaera</i>     | Hawaii | KU128629 |
| MOL12-4-SW-A-2   | <i>Mycobacterium chimaera</i>     | Hawaii | KU128630 |
| 12-42-SW-B-3     | <i>Mycobacterium abscessus</i>    | Hawaii | KU128631 |
| 12-2-SW-A-2      | <i>Mycobacterium porcinum</i>     | Hawaii | KU128632 |
| 12-2-S-1-1       | <i>Mycobacterium marseillense</i> | Hawaii | KU128633 |
| 12-7-SW-A-1      | <i>Mycobacterium gordonae</i>     | Hawaii | KU128634 |
| 12-16-SW-A-1     | <i>Mycobacterium phocaicum</i>    | Hawaii | KU128635 |
| 12-16-SW-A-2     | <i>Mycobacterium phocaicum</i>    | Hawaii | KU128636 |
| 12-26-S-1-1      | <i>Mycobacterium interjectum</i>  | Hawaii | KU128637 |
| 12-29-S-1-2      | <i>Mycobacterium colombiense</i>  | Hawaii | KU128638 |
| 12-44-SW-A-3     | <i>Mycobacterium paraffinicum</i> | Hawaii | KU128639 |
| 12-53-SW-A-3     | <i>Mycobacterium chelonae</i>     | Hawaii | KU128640 |
| 12-57-S-1-1      | <i>Mycobacterium arupense</i>     | Hawaii | KU128641 |
| KAU12-1-S-1-1    | <i>Mycobacterium septicum</i>     | Hawaii | KU128642 |
| KAU12-3-SW-A-2   | <i>Mycobacterium porcinum</i>     | Hawaii | KU128643 |
| KAU-12-9-SW-A-1  | <i>Mycobacterium porcinum</i>     | Hawaii | KU128644 |
| BLGD-12-4-SW-B-1 | <i>Mycobacterium longobardum</i>  | Hawaii | KU128645 |
| 12-7-S-1-2       | <i>Mycobacterium chimaera</i>     | Hawaii | KU128646 |
| 12-56-S-1-1      | <i>Mycobacterium chimaera</i>     | Hawaii | KU128647 |
| 12-29-S-1-1      | <i>Mycobacterium colombiense</i>  | Hawaii | KU128648 |
| 12-2-SW-B-1      | <i>Mycobacterium chimaera</i>     | Hawaii | KU128649 |
| 12-2-SW-B-2      | <i>Mycobacterium chimaera</i>     | Hawaii | KU128650 |
| 12-2-SW-B-3      | <i>Mycobacterium chimaera</i>     | Hawaii | KU128651 |
| 12-16-SW-B-1     | <i>Mycobacterium chimaera</i>     | Hawaii | KU128652 |
| 12-17-SW-A-1     | <i>Mycobacterium chimaera</i>     | Hawaii | KU128653 |
| 12-20-SW-A-1     | <i>Mycobacterium chimaera</i>     | Hawaii | KU128654 |
| 12-21-SW-A-1     | <i>Mycobacterium gordonae</i>     | Hawaii | KU128655 |
| 12-22-SW-A-1     | <i>Mycobacterium chimaera</i>     | Hawaii | KU128656 |
| 12-24-SW-A-1     | <i>Mycobacterium chimaera</i>     | Hawaii | KU128657 |
| 12-24-SW-B-2     | <i>Mycobacterium chimaera</i>     | Hawaii | KU128658 |
| 12-25-SW-B-1     | <i>Mycobacterium chimaera</i>     | Hawaii | KU128659 |
| 12-25-SW-B-2     | <i>Mycobacterium chimaera</i>     | Hawaii | KU128660 |
| 12-25-S-1-1      | <i>Mycobacterium marseillense</i> | Hawaii | KU128661 |
| 12-25-S-1-2      | <i>Mycobacterium marseillense</i> | Hawaii | KU128662 |
| 12-25-S-1-3      | <i>Mycobacterium marseillense</i> | Hawaii | KU128663 |
| 12-27-SW-A-1     | <i>Mycobacterium chimaera</i>     | Hawaii | KU128664 |
| 12-28-SW-A-1     | <i>Mycobacterium chimaera</i>     | Hawaii | KU128665 |
| 12-29-SW-A-1     | <i>Mycobacterium chimaera</i>     | Hawaii | KU128666 |

|                |                                     |                 |          |
|----------------|-------------------------------------|-----------------|----------|
| 12-31-SW-B-1   | <i>Mycobacterium chimaera</i>       | Hawaii          | KU128667 |
| 12-32-SW-B-1   | <i>Mycobacterium chimaera</i>       | Hawaii          | KU128668 |
| 12-32-SW-B-2   | <i>Mycobacterium chimaera</i>       | Hawaii          | KU128669 |
| 12-32-SW-B-3   | <i>Mycobacterium chimaera</i>       | Hawaii          | KU128670 |
| 12-33-SW-A-1   | <i>Mycobacterium chimaera</i>       | Hawaii          | KU128671 |
| 12-35-SW-A-1   | <i>Mycobacterium chimaera</i>       | Hawaii          | KU128672 |
| 12-38-SW-A-1   | <i>Mycobacterium chimaera</i>       | Hawaii          | KU128673 |
| 12-38-SW-A-2   | <i>Mycobacterium chimaera</i>       | Hawaii          | KU128674 |
| 12-40-SW-A-1   | <i>Mycobacterium chimaera</i>       | Hawaii          | KU128675 |
| 12-40-SW-A-2   | <i>Mycobacterium chimaera</i>       | Hawaii          | KU128676 |
| 12-42-SW-A-1   | <i>Mycobacterium chimaera</i>       | Hawaii          | KU128677 |
| 12-42-SW-A-2   | <i>Mycobacterium chimaera</i>       | Hawaii          | KU128678 |
| 12-42-SW-A-3   | <i>Mycobacterium chimaera</i>       | Hawaii          | KU128679 |
| 12-43-SW-A-1   | <i>Mycobacterium chimaera</i>       | Hawaii          | KU128680 |
| 12-44-SW-A-1   | <i>Mycobacterium chimaera</i>       | Hawaii          | KU128681 |
| AH10           | <i>Mycobacterium chimaera</i>       | Hawaii          | KU128682 |
| AH11           | <i>Mycobacterium chimaera</i>       | Hawaii          | KU128683 |
| AH12           | <i>Mycobacterium chimaera</i>       | Hawaii          | KU128684 |
| AH13           | <i>Mycobacterium chimaera</i>       | Hawaii          | KU128685 |
| AH14           | <i>Mycobacterium farcinogenes</i>   | Hawaii          | KU128686 |
| AH15           | <i>Mycobacterium chimaera</i>       | Hawaii          | KU128687 |
| AH16           | <i>Mycobacterium chimaera</i>       | Hawaii          | KU128688 |
| AH17           | <i>Mycobacterium marseillense</i>   | Hawaii          | KU128689 |
| AH18           | <i>Mycobacterium chimaera</i>       | Hawaii          | KU128690 |
| AH02           | <i>Mycobacterium intracellulare</i> | Hawaii          | KU128691 |
| AH20           | <i>Mycobacterium timonense</i>      | Hawaii          | KU128692 |
| AH21           | <i>Mycobacterium chimaera</i>       | Hawaii          | KU128693 |
| AH22           | <i>Mycobacterium chimaera</i>       | Hawaii          | KU128694 |
| AH24           | <i>Mycobacterium intracellulare</i> | Hawaii          | KU128695 |
| AH25           | <i>Mycobacterium chimaera</i>       | Hawaii          | KU128696 |
| AH03           | <i>Mycobacterium chimaera</i>       | Hawaii          | KU128697 |
| AH04           | <i>Mycobacterium intracellulare</i> | Hawaii          | KU128698 |
| AH05           | <i>Mycobacterium chimaera</i>       | Hawaii          | KU128699 |
| AH06           | <i>Mycobacterium chimaera</i>       | Hawaii          | KU128700 |
| AH07           | <i>Mycobacterium marseillense</i>   | Hawaii          | KU128701 |
| AH08           | <i>Mycobacterium chimaera</i>       | Hawaii          | KU128702 |
| AH09           | <i>Mycobacterium intracellulare</i> | Hawaii          | KU128703 |
| KAU-12-5-S-1-1 | <i>Mycobacterium sp. 11</i>         | Hawaii          | KU128704 |
| 12-6-S-1-1     | <i>Mycobacterium sp. 2</i>          | Hawaii          | KU128705 |
| 12-6-S-1-3     | <i>Mycobacterium sp. 3</i>          | Hawaii          | KU128706 |
| JS010.1        | <i>Mycobacterium chimaera</i>       | Continental USA | KU144826 |
| JS010.2        | <i>Mycobacterium chimaera</i>       | Continental USA | KU144827 |
| JS082.1        | <i>Mycobacterium chimaera</i>       | Continental USA | KU144828 |

|           |                               |                 |          |
|-----------|-------------------------------|-----------------|----------|
| JS082.2   | <i>Mycobacterium chimaera</i> | Continental USA | KU144829 |
| MA28463.1 | <i>Mycobacterium chimaera</i> | Continental USA | KU144830 |
| MA28463.2 | <i>Mycobacterium chimaera</i> | Continental USA | KU144831 |
| MA32872.1 | <i>Mycobacterium chimaera</i> | Continental USA | KU144832 |
| MA32872.2 | <i>Mycobacterium chimaera</i> | Continental USA | KU144833 |
| MA4156.1  | <i>Mycobacterium chimaera</i> | Continental USA | KU144834 |
| MA4156.2  | <i>Mycobacterium chimaera</i> | Continental USA | KU144835 |
| MA4163.1  | <i>Mycobacterium chimaera</i> | Continental USA | KU144836 |
| MA4163.2  | <i>Mycobacterium chimaera</i> | Continental USA | KU144837 |
| MA5205.1  | <i>Mycobacterium chimaera</i> | Continental USA | KU144838 |
| MA5205.2  | <i>Mycobacterium chimaera</i> | Continental USA | KU144839 |
| MA5324.1  | <i>Mycobacterium chimaera</i> | Continental USA | KU144840 |
| MA5324.2  | <i>Mycobacterium chimaera</i> | Continental USA | KU144841 |
| MA5359    | <i>Mycobacterium chimaera</i> | Continental USA | KU144842 |
| MA5670    | <i>Mycobacterium chimaera</i> | Continental USA | KU144843 |
| MA6378    | <i>Mycobacterium chimaera</i> | Continental USA | KU144844 |
| MA6533    | <i>Mycobacterium chimaera</i> | Continental USA | KU144845 |
| MA7129    | <i>Mycobacterium chimaera</i> | Continental USA | KU144846 |
| MA7233    | <i>Mycobacterium chimaera</i> | Continental USA | KU144847 |
| MA7294.1  | <i>Mycobacterium chimaera</i> | Continental USA | KU144848 |
| MA7294.2  | <i>Mycobacterium chimaera</i> | Continental USA | KU144849 |
| MA7320.1  | <i>Mycobacterium chimaera</i> | Continental USA | KU144850 |
| MA7320.2  | <i>Mycobacterium chimaera</i> | Continental USA | KU144851 |
| MA7907    | <i>Mycobacterium chimaera</i> | Continental USA | KU144852 |
| MA7916.1  | <i>Mycobacterium chimaera</i> | Continental USA | KU144853 |
| MA7916.2  | <i>Mycobacterium chimaera</i> | Continental USA | KU144854 |
| MA7953.1  | <i>Mycobacterium chimaera</i> | Continental USA | KU144855 |
| MA7953.2  | <i>Mycobacterium chimaera</i> | Continental USA | KU144856 |
| P32P1.1   | <i>Mycobacterium chimaera</i> | Continental USA | KU144857 |
| P32P1.2   | <i>Mycobacterium chimaera</i> | Continental USA | KU144858 |

Table S1. Mycobacteria isolates derived from Hawaiian and Continental USA clinical and household specimens. Species identification and NCBI GenBank accession numbers are provided for each isolate.

| Isolate/Strain | Species                        | Location | Accession #       |
|----------------|--------------------------------|----------|-------------------|
| AP025          | <i>Mycobacterium abscessus</i> | USA      | EU090064.1        |
| AP038          | <i>Mycobacterium abscessus</i> | USA      | EU090063.1        |
| ATCC 19977     | <i>Mycobacterium abscessus</i> | USA      | JF346872.1        |
| ATCC 23003     | <i>Mycobacterium abscessus</i> | USA      | AY262741.1        |
| BD             | <i>Mycobacterium abscessus</i> | Korea    | NZ_AHAS00000000.1 |
| CCUG 48898     | <i>Mycobacterium abscessus</i> | France   | NZ_AP014547.1     |
| CIP104536      | <i>Mycobacterium abscessus</i> | France   | EU109292.1        |
| CIP104536T     | <i>Mycobacterium abscessus</i> | France   | AY147164.1        |
| CIP108297      | <i>Mycobacterium abscessus</i> | France   | EU254721.1        |
| CRM 0020       | <i>Mycobacterium abscessus</i> | Brazil   | CP012044.1        |
| CRM 0273       | <i>Mycobacterium abscessus</i> | Brazil   | NZ_ATFQ00000000.1 |
| FI-09338       | <i>Mycobacterium abscessus</i> | Italy    | HM807414.1        |
| FI-09380       | <i>Mycobacterium abscessus</i> | Italy    | HM807434.1        |
| FI-08197       | <i>Mycobacterium abscessus</i> | Italy    | HM807419.1        |
| FI-07134       | <i>Mycobacterium abscessus</i> | Italy    | EU370524.1        |
| GO-06          | <i>Mycobacterium abscessus</i> | Brazil   | FJ859894.1        |
| 5S-0304        | <i>Mycobacterium abscessus</i> | USA      | NZ_AKTX00000000.1 |
| IAL014         | <i>Mycobacterium abscessus</i> | Brazil   | HQ404274.1        |
| M24            | <i>Mycobacterium abscessus</i> | Malaysia | NZ_AJLY00000000.2 |
| P01            | <i>Mycobacterium abscessus</i> | Brazil   | FJ590435.1        |
| PCH-017        | <i>Mycobacterium abscessus</i> | USA      | NC_018150.2       |
| UC22           | <i>Mycobacterium abscessus</i> | Korea    | CP012044.1        |
| 6              | <i>Mycobacterium chimaera</i>  | France   | EU770576.1        |
| CIP 107892     | <i>Mycobacterium chimaera</i>  | France   | GQ153309.1        |
| DSM 446232     | <i>Mycobacterium chimaera</i>  | Germany  | EF521908.1        |
| FI-09331       | <i>Mycobacterium chimaera</i>  | Italy    | HM807412.1        |
| ATCC 19237     | <i>Mycobacterium chelonae</i>  | USA      | EU109289.1        |
| ATCC 35752     | <i>Mycobacterium chelonae</i>  | France   | CP010946.1        |
| CIP 104535     | <i>Mycobacterium chelonae</i>  | France   | EU109286.1        |
| CIP 104535T    | <i>Mycobacterium chelonae</i>  | France   | AY147163.1        |
| D10            | <i>Mycobacterium chelonae</i>  | France   | EU109287.1        |
| D8             | <i>Mycobacterium chelonae</i>  | France   | EU109290.1        |
| FI-08088       | <i>Mycobacterium chelonae</i>  | Italy    | FJ418059.1        |
| FI-09001       | <i>Mycobacterium chelonae</i>  | Italy    | HM807422.1        |
| FI-09279       | <i>Mycobacterium chelonae</i>  | Italy    | HM807417.1        |
| FI-09307       | <i>Mycobacterium chelonae</i>  | Italy    | HM807411.1        |
| PCH-038        | <i>Mycobacterium chelonae</i>  | USA      | JN400396.1        |
| QIA-37         | <i>Mycobacterium chelonae</i>  | Korea    | KF910163.1        |
| QIA-52         | <i>Mycobacterium chelonae</i>  | Korea    | KF910170.1        |

|              |                               |        |            |
|--------------|-------------------------------|--------|------------|
| U4           | <i>Mycobacterium chelonae</i> | France | EU109291.1 |
| U5           | <i>Mycobacterium chelonae</i> | France | EU109288.1 |
| 08-283       | <i>Mycobacterium porcinum</i> | USA    | EU597591.1 |
| ATCC 49939   | <i>Mycobacterium porcinum</i> | USA    | JN682044.1 |
| ATCC BAA-328 | <i>Mycobacterium porcinum</i> | USA    | JN682045.1 |
| CIP 105392   | <i>Mycobacterium porcinum</i> | France | AY262737.1 |
| CST-9.1      | <i>Mycobacterium porcinum</i> | China  | JF508476.1 |
| FI-08029     | <i>Mycobacterium porcinum</i> | Italy  | FJ418054.1 |
| MF-114       | <i>Mycobacterium porcinum</i> | USA    | JN682043.1 |
| MF-205       | <i>Mycobacterium porcinum</i> | USA    | JN682046.1 |
| MF-3176      | <i>Mycobacterium porcinum</i> | USA    | JN682049.1 |
| MF-2612      | <i>Mycobacterium porcinum</i> | USA    | JN682048.1 |

Table S2. Type strain and representative isolate rpoB sequences of *M. abscessus*, *M. chelonae*, *M. chimaera*, and *M. porcinum* from NCBI. Isolation location and NCBI GenBank accession numbers are provided for each sequence.
